# Supplementary material for: Natural Products Extracted from Fungal Species as New Potential Anti-Cancer Drugs: A Structure-Based Drug Repurposing Approach Targeting HDAC7
Source: PubMed Central journal article supplement (PMC7728054; doi:10.3390/molecules25235524), 2020-11-25

## Supplementary Material for

# Natural products extracted from fungal species as new potential anti-cancer drugs: a structure-based drug repurposing approach targeting HDAC7

Annalisa Maruca <sup>1,2#</sup>, Roberta Rocca <sup>2,3#</sup>, Raffaella Catalano <sup>1,2</sup>, Francesco Mesiti <sup>1,2</sup>, Giosuè Costa <sup>1,2</sup>, Delia Lanzillotta <sup>3</sup>, Alessandro Salatino <sup>3</sup>, Francesco Ortuso <sup>1,2</sup>, Francesco Trapasso <sup>3</sup>, Stefano Alcaro <sup>1,2\*</sup>, Anna Artese <sup>1,2</sup>

<sup>1</sup>Dipartimento di Scienze della Salute, Università "Magna Græcia" di Catanzaro, Campus "S. Venuta", Viale Europa, 88100, Catanzaro, Italy.

<sup>2</sup>Net4Science Academic Spin-Off, Università "Magna Græcia" di Catanzaro, Campus "S. Venuta", Viale Europa, 88100, Catanzaro, Italy.

<sup>3</sup>Dipartimento di Medicina Sperimentale e Clinica, Università "Magna Græcia" di Catanzaro, Campus "S. Venuta", Viale Europa, 88100, Catanzaro, Italy.

\* Correspondence: [alcaro@unicz.it](mailto:alcaro@unicz.it); Tel. +39 0961 3694198 (S. A.)

#These authors contributed equally.

## Table of Contents

**Figure S1.** 3D and 2D representations of the best re-docking pose of Trichostatin A (TSA) against HDAC7 (PDB code 3C10) receptor.

**Figure S2.** 3D and 2D representations of the **(R)-2** complexed to HDAC7.

**Table S1.** Name, 2D structure and G-Score value (kcal/mol) of the **(R)-2**.

**Figure S3.** Root Mean Square Deviation trends of both HDAC7 and ligands heavy atoms in presence of *hit* **(S)-2** and TSA.

**Figure S4.** Root Mean Square Fluctuation trend of HDAC7 residues in presence of *hit* **(S)-2** and TSA, and secondary structure elements (SSE) distribution of both TSA and *hit* **(S)-2**.

**Figure S5.** Ligand RMSF trend of both *hit* **(S)-2** and TSA.

**Figure S1.** (a) 3D representation of the best re-docking pose of Trichostatin A (TSA) against HDAC7 (PDB code 3C10) receptor obtained using the Glide-SP algorithm. The protein is shown as grey surface, while the amino acid residues involved in the molecular interactions are reported as grey carbon sticks. Re-docked and crystallographic conformations of TSA are displayed as green and orange carbon ball-and-sticks, respectively. (b) 2D representation of the key interactions of TSA in the binding pocket of HDAC7, according to the crystallographic pose.

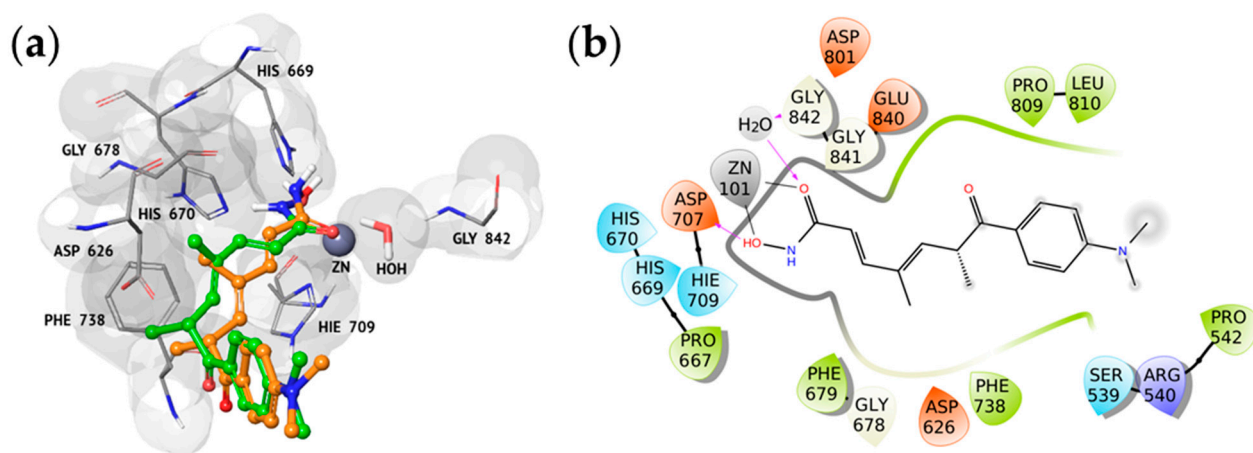

**Figure S2.** (a) 3D representations of the (R)-2 complexed to HDAC7. The protein is shown as grey surface, the ligands are displayed as green carbon ball-and-sticks, while the amino acid residues involved in the molecular interactions are reported as grey carbon sticks. (b) 2D representation of the key interactions of the (R)-2 in the binding pocket of HDAC7.

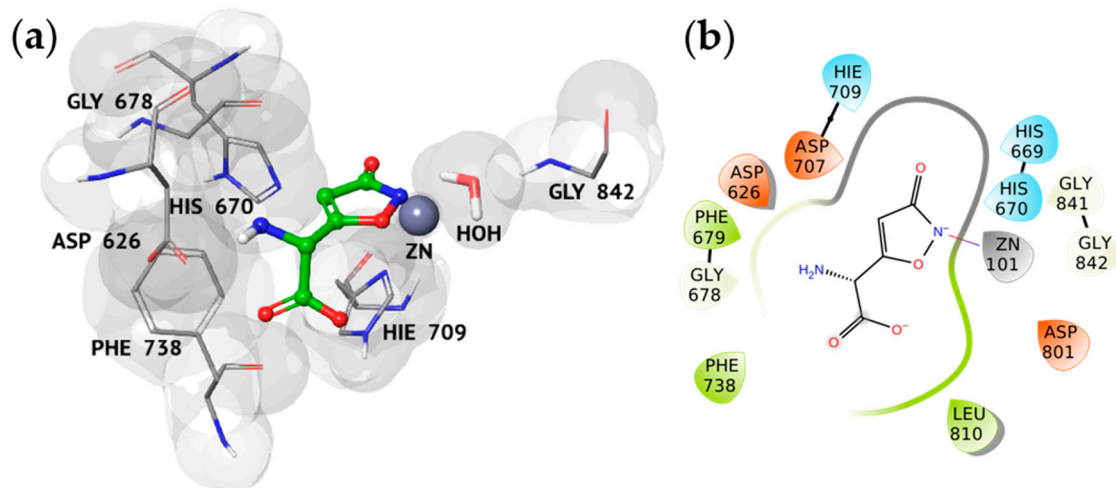

**Table S1.** Name, 2D structure, and G-Score value (kcal/mol) of the **(R)-2**.

| Name                                 | 2D Structure                                                                      | G-Score<br>(kcal/mol) |
|--------------------------------------|-----------------------------------------------------------------------------------|-----------------------|
| <b>(R)-2</b> or<br>(R)-Ibotenic acid | 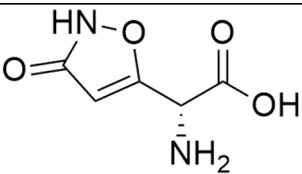 | -6.50                 |

**Figure S3.** (a) Root Mean Square Deviation (RMSD) trend of HDAC7 heavy atom in presence of *hit* **(S)-2** and TSA, indicated by a red and a green line, respectively. (b) RMSD trends of ligands heavy atoms, after the alignment of the complex on the protein backbone of the first MD frame structure.

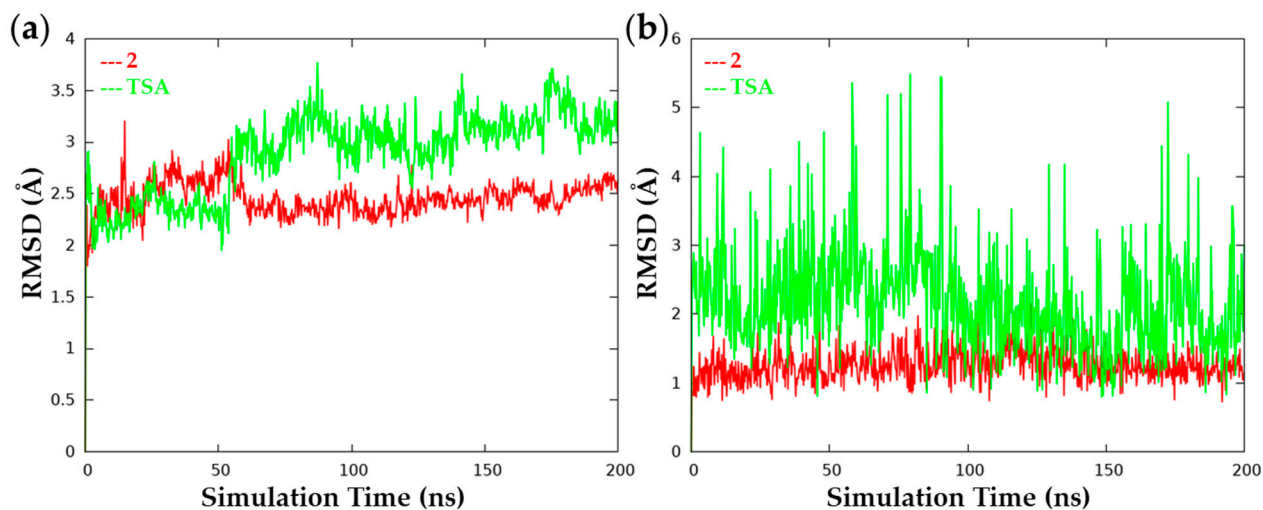

**Figure S4.** (a) Root Mean Square Fluctuation (RMSF) trend of HDAC7 residues in presence of *hit* (S)-2 and TSA, indicated by a red and a green line, respectively. Secondary structure elements (SSE) distribution by residue index of: (b) TSA and (c) *hit* (S)-2 throughout the protein structure during the whole simulation. Protein SSE like alpha-helices and beta-strands are represented in orange and cyan Gaussian curves, respectively.

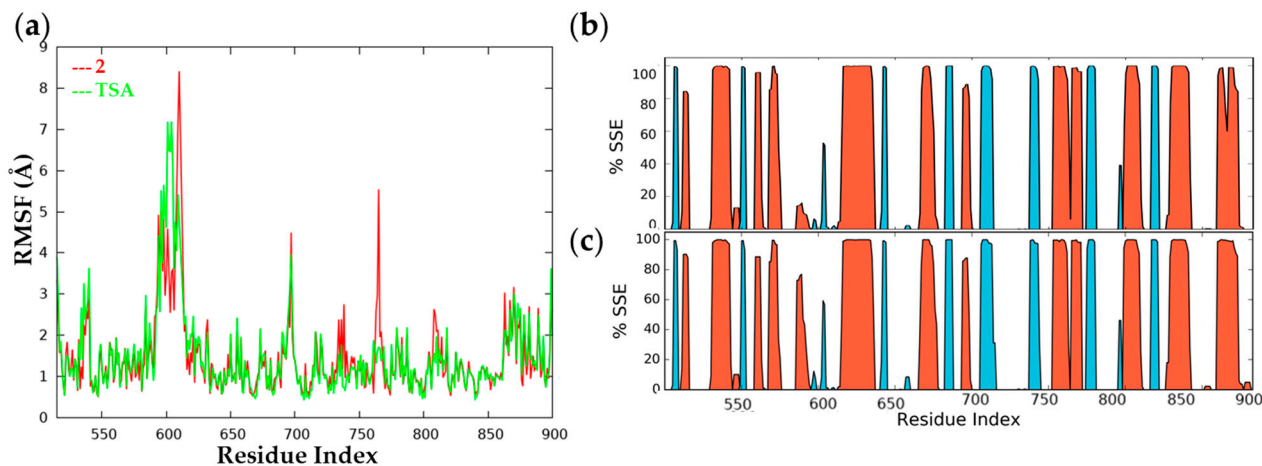

**Figure S5.** (a) Ligand RMSF trend of *hit* (S)-2. (b) Ligand RMSF trend of TSA. RMSF shows the ligand's fluctuations broken down by atom, corresponding to the 2D structure in the top panel. The protein-ligand complex is first aligned on the protein backbone and then the ligand RMSF is measured on the ligand heavy atoms.

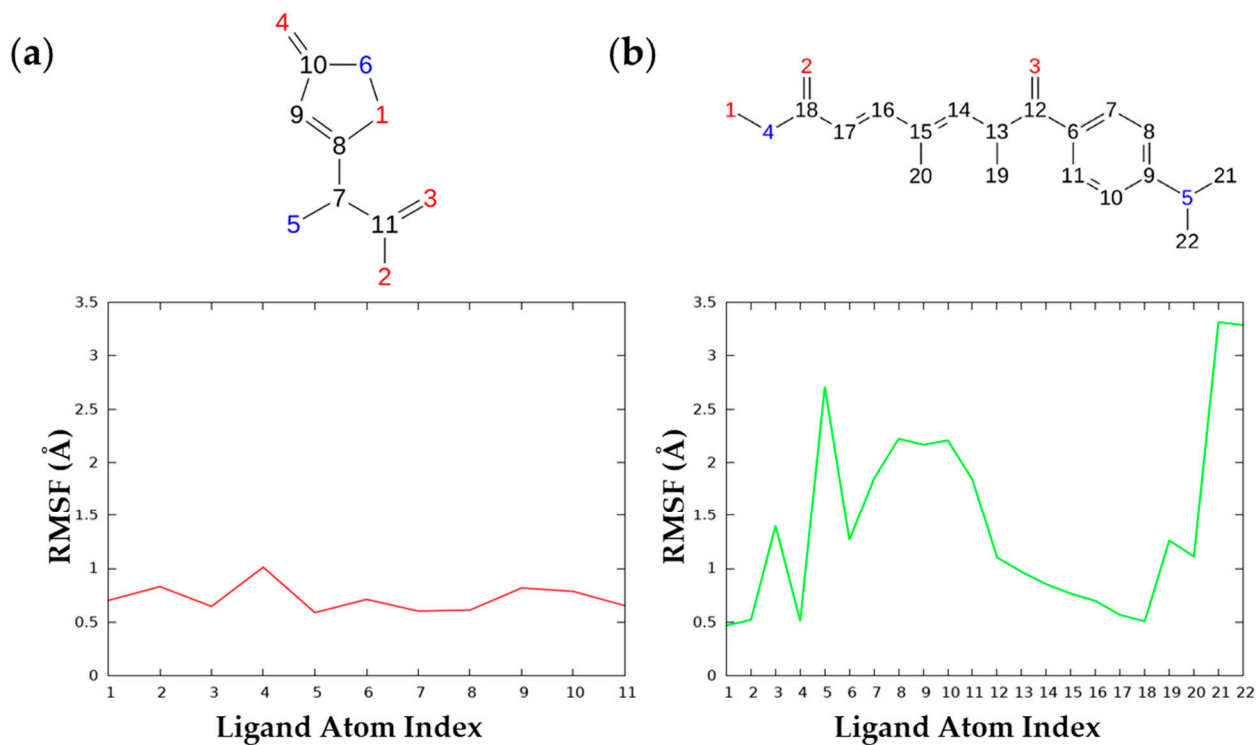

Supplement: molecules-25-05524-s001.pdf [file molecules-25-05524-s001.pdf]
